# Supplementary material for: Disruption of the Unique ABCG-Family NBD:NBD Interface Impacts Both Drug Transport and ATP Hydrolysis
Source: MDPI journal article supplement (doi:10.3390/ijms21030759), 2020-01-23
Supplement: s1 [file s1]

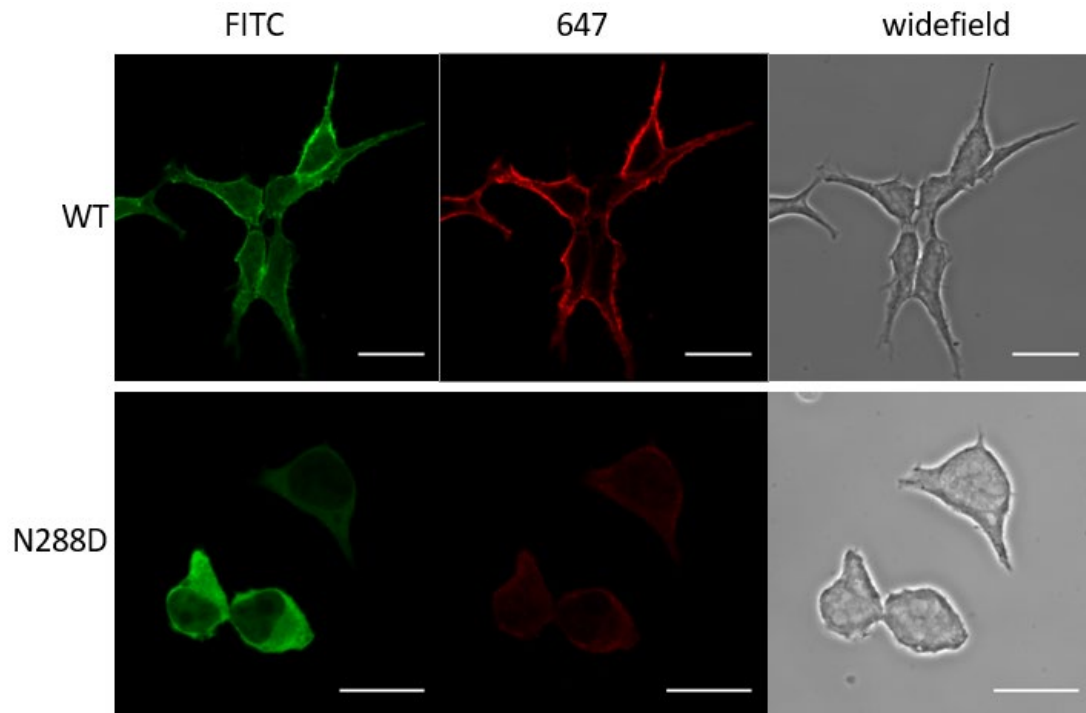

**Supplementary Figure S1. Confirmation of intracellular localisation of N288D.** HEK293T cells expressing WT (top) and N288D (bottom) ABCG2 isoforms were visualised for protein localisation by confocal microscopy in fixed cells (4% paraformaldehyde, 5 minutes) for both GFP expression (left hand panels) and for ABCG2 expression (middle panels, 5D3 antibody and AlexaFluor-647 coupled secondary antibody). Panels represent Visualisation of cells was conducted on an LSM710 confocal laser scanning microscope (Zeiss, Jena, Germany) equipped with a Plan-Apochromat 63×/1.40 Oil Ph3 DIC M27 objective and argon laser. For detection of sfGFP-ABCG2 isoforms, a 2% argon laser power was used with excitation set at 488 nm and emission collected between 500–530 nm (FITC channel). Scale bar is representative of 20  $\mu$ m.
